# Supplementary material for: Self-supported CoMoO4/NiFe-LDH core–shell nanorods grown on nickel foam for enhanced electrocatalysis of oxygen evolution
Source: Royal Society of Chemistry journal article supplement (doi:10.1039/d2dt02167f), 2022-01-01
Supplement: d2dt02167f1.pdf [file d2dt02167f1.pdf]

## Supporting Information

### Self-supported CoMoO<sub>4</sub>/NiFe-LDH Core-Shell nanorods grown on nickel foam for enhanced electrocatalysis of oxygen evolution

Haoze Tian, Ke Zhang, Xiaoan Feng, Jinxi Chen, Yongbing Lou \*

School of Chemistry and Chemical Engineering, Southeast University, Nanjing, 211189, P. R. China. E-

mail: lou@seu.edu.cn

## Materials

Sodium molybdate dihydrate  $[(\text{NH}_4)_6\text{Mo}_7\text{O}_{24}\cdot 4\text{H}_2\text{O}]$ , AR], cobalt nitrate hexahydrate  $[\text{Co}(\text{NO}_3)_2\cdot 6\text{H}_2\text{O}]$ , AR], urea  $[\text{CO}(\text{NH}_2)_2]$ , AR], nickel nitrate hexahydrate  $[\text{Ni}(\text{NO}_3)_2\cdot 6\text{H}_2\text{O}]$ , AR], iron nitrate nonahydrate  $[\text{Fe}(\text{NO}_3)_3\cdot 9\text{H}_2\text{O}]$ . The above materials were purchased from Aladdin Reagent (Shanghai) Co., Ltd.

## Synthesis of NiFe-LDH@NF

NF (2\*3cm) was prepared by the above method. NiFe-LDH@NF was prepared by electrodeposition for 300 s under the above experimental conditions.

## Synthesis of RuO<sub>2</sub> electrodes

After strong ultrasonication for 30 min, 40 mg RuO<sub>2</sub> was uniformly disseminated in a mixture of 50  $\mu\text{L}$  Nafion solution and 1mL mixed solution of ethanol and water to make a homogeneous ink. The catalyst ink was then dropped over the cleaned NF (1\*1.5 cm), which was then dried for 12 h at 60 °C in a vacuum oven, producing RuO<sub>2</sub>/NF electrodes.

## Synthesis of Powder-CoMoO<sub>4</sub>/NiFe-LDH/NF and Powder-NiFe-LDH/NF

Powder of CoMoO<sub>4</sub>/NiFe-LDH and NiFe-LDH were scraped from CoMoO<sub>4</sub>/NiFe-LDH@NF and NiFe-LDH@NF electrodes, respectively, and then Powder-CoMoO<sub>4</sub>/NiFe-LDH/NF and Powder-NiFe-LDH/NF electrodes were prepared according to the method of RuO<sub>2</sub> electrodes.

## Physicochemical Characterization

The morphology was obtained by scanning electron microscopy (SEM, Sirion) and transmission electron microscopy (TEM, Talos F200X). X-ray diffraction (XRD) patterns were obtained via an Ultima IV X-ray diffractometer utilizing Cu K $\alpha$ 1 radiation ( $\lambda = 1.5406 \text{ \AA}$ ) at a scanning speed of 0.02 steps per second. X-ray photoelectron spectroscopy (XPS, Thermo Scientific ESCALAB 250Xi) was utilized to obtain data on components in synthetic materials.

## Electrochemical measurements

The electrochemical measurements were carried out utilizing a typical three-electrode system on a CHI-660D electrochemical workstation (CHI Instrument, Shanghai, China). The electrolyte used was 1 M KOH (pH  $\approx 14.0$ ), and the experiment was conducted at room temperature in an air atmosphere. The working electrode was made up of a self-supported NF electrocatalyst, while the counter electrode and reference electrode were made up of Pt and Ag/AgCl. The formula:  $E(\text{vs RHE}) = E(\text{vs Ag/AgCl}) + 0.097 + 0.0591 \text{ pH}$  was utilized to change the tested potentials to reversible hydrogen electrodes (RHEs). A scan rate of 5  $\text{mV}\cdot\text{s}^{-1}$  and 90% iR-compensation were applied for linear sweep voltammetry (LSV) curves. Electrochemical impedance spectroscopy (EIS) studies were performed in the 100,000-0.01 Hz frequency range (versus Ag/AgCl). The OER was tested for stability using the chronoamperometry method for 20 h at a voltage of 1.46 V (vs. RHE). Electrochemical surface areas (ECSAs) were acquired on the basis of the following formula:  $\text{ECSAs} = \text{Cdl}/\text{Cs}$ . Here, Cdl represented the double-layer capacitance acquired from CV cycles.

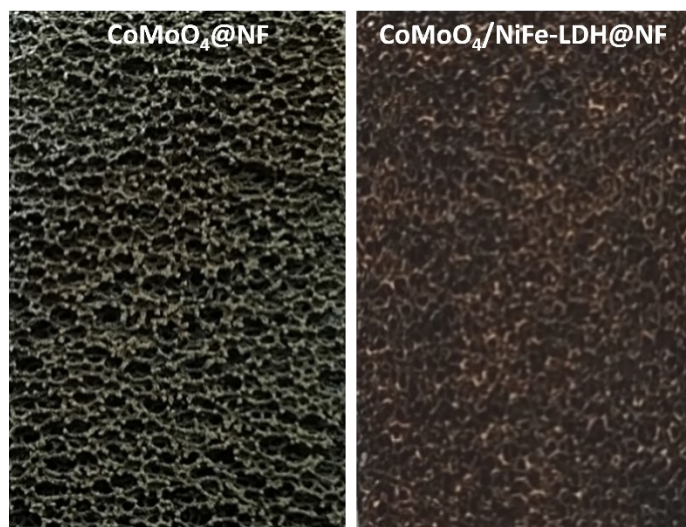

Fig. S1. The photographic images of CoMoO<sub>4</sub>@NF and CoMoO<sub>4</sub>/NiFe-LDH@NF.

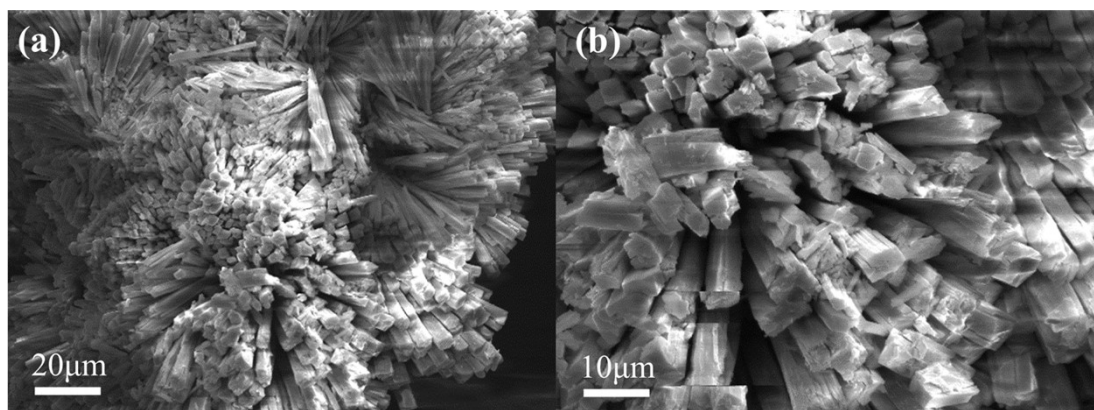

Fig. S2 (a, b). SEM images of CoMoO<sub>4</sub>@NF.

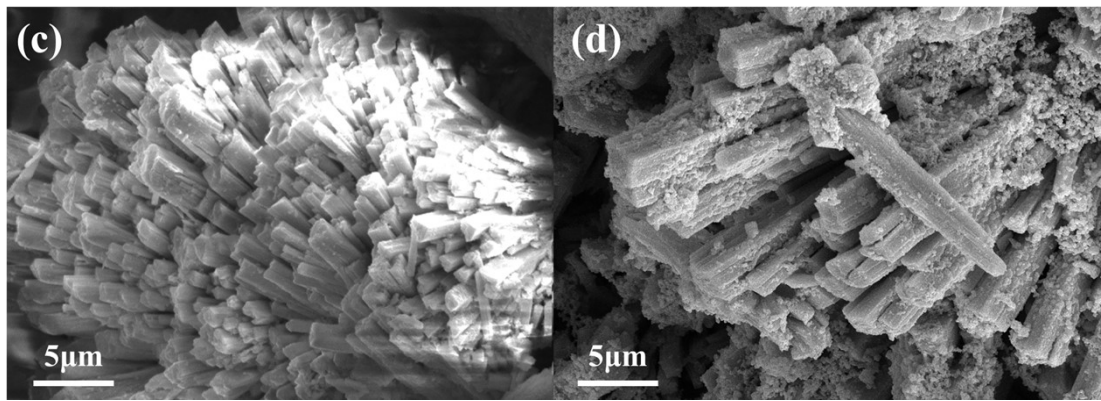

Fig. S3 (a). SEM images of  $\text{CoMoO}_4\text{-150/NiFe-LDH@NF}$  and (b).  $\text{CoMoO}_4\text{-450/NiFe-LDH@NF}$ .

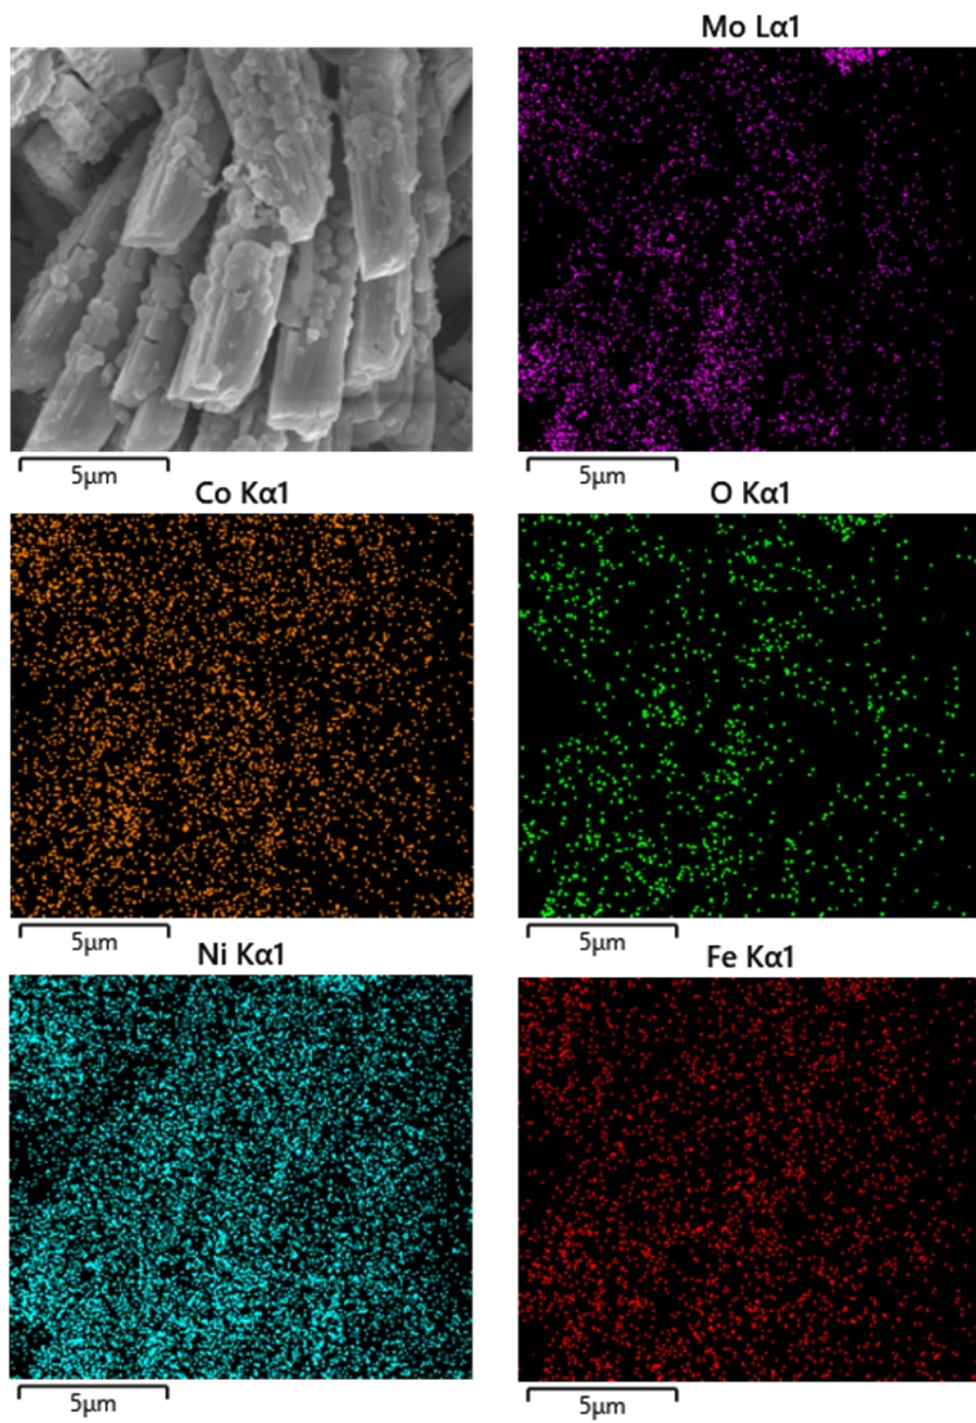

Fig. S4. EDS elemental mapping images of Co, Mo, O, Fe and Ni in CoMoO<sub>4</sub>-300/NiFe-LDH@NF.



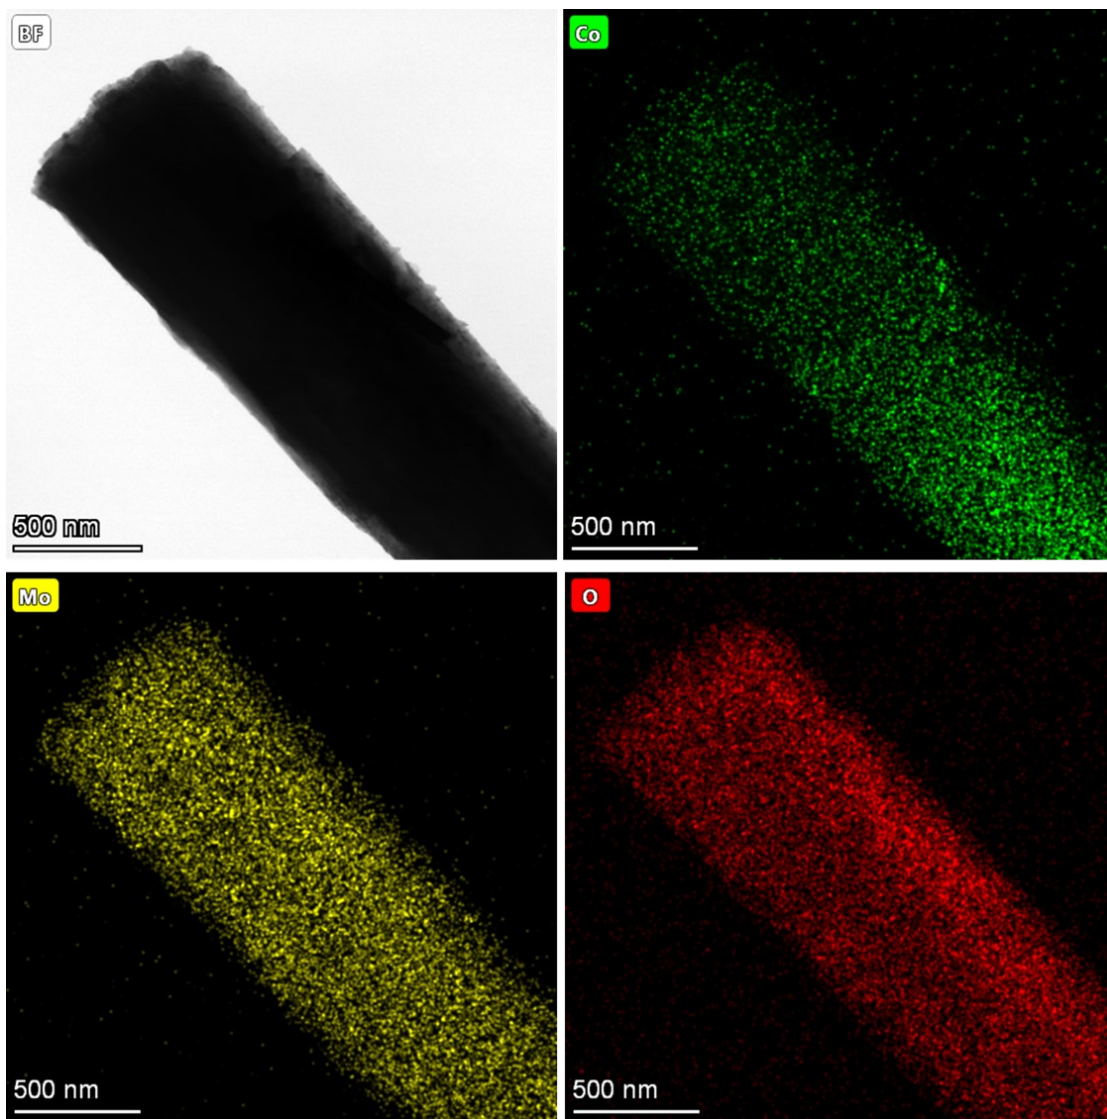

Fig. S5. HAADF-STEM and EDX elemental mapping images of Co, Mo, and O in CoMoO<sub>4</sub>.

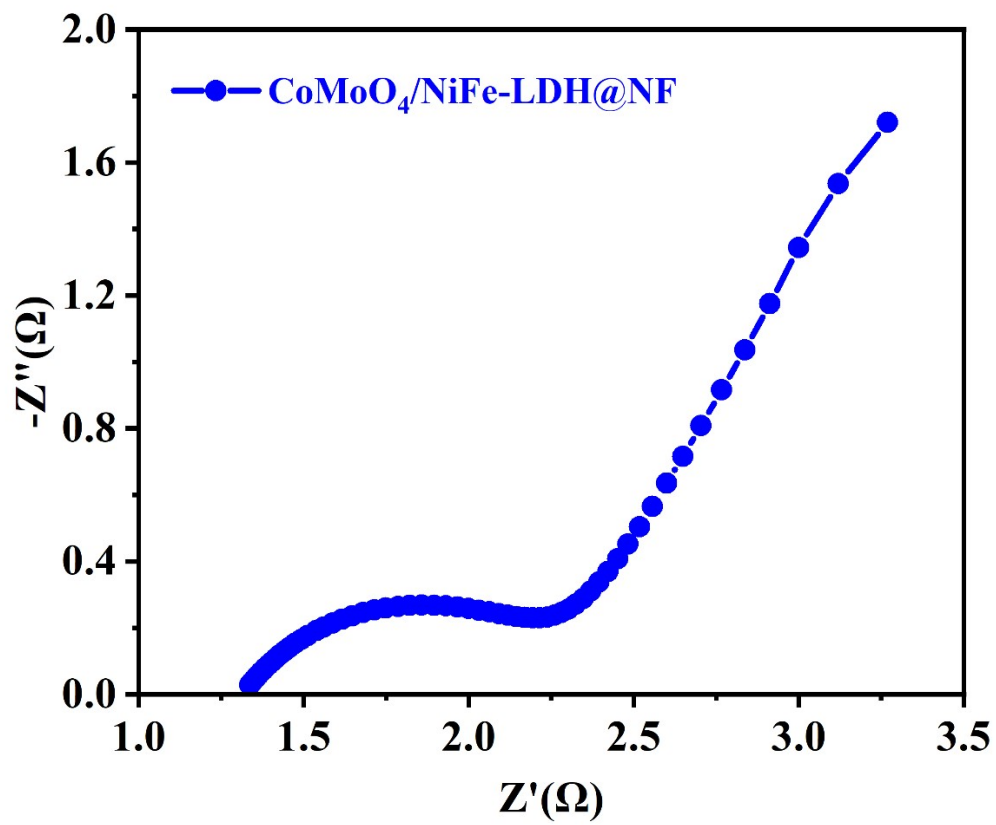

Fig. S6. EIS Nyquist plots and fitting curves of CoMoO<sub>4</sub>/NiFe-LDH@NF.



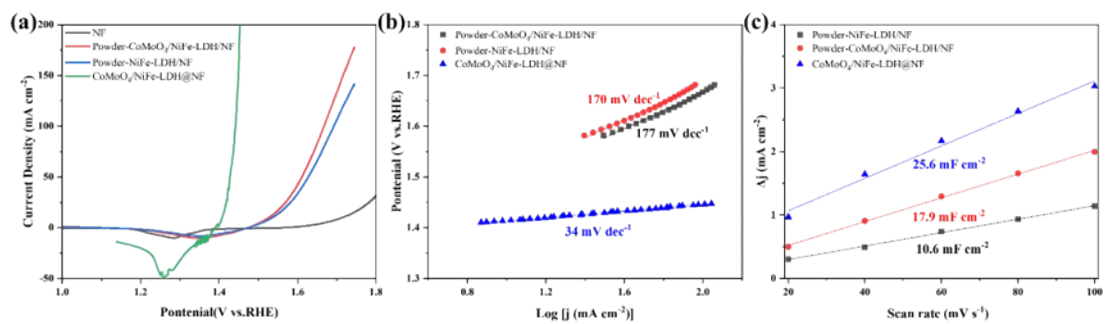

Fig. S7. (a) OER polarization curves with 90% iR compensation for NF, Powder-CoMoO<sub>4</sub>/NiFe-LDH Powder-NiFe-LDH/NF, and CoMoO<sub>4</sub>/NiFe-LDH@NF. (b) Tafel plots and (c). C<sub>dl</sub> values of Powder-CoMoO<sub>4</sub>/NiFe-LDH Powder-NiFe-LDH/NF and CoMoO<sub>4</sub>/NiFe-LDH@NF.

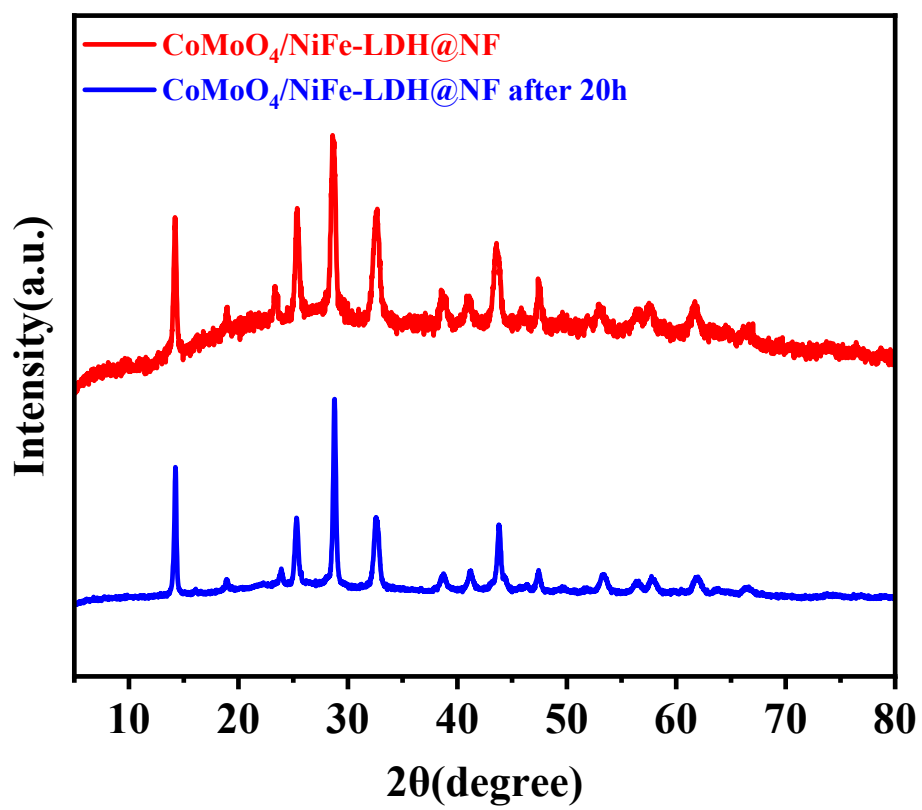

Fig. S8. XRD patterns of CoMoO<sub>4</sub>/NiFe-LDH@NF and CoMoO<sub>4</sub>/NiFe-LDH@NF after 20 h stability test.

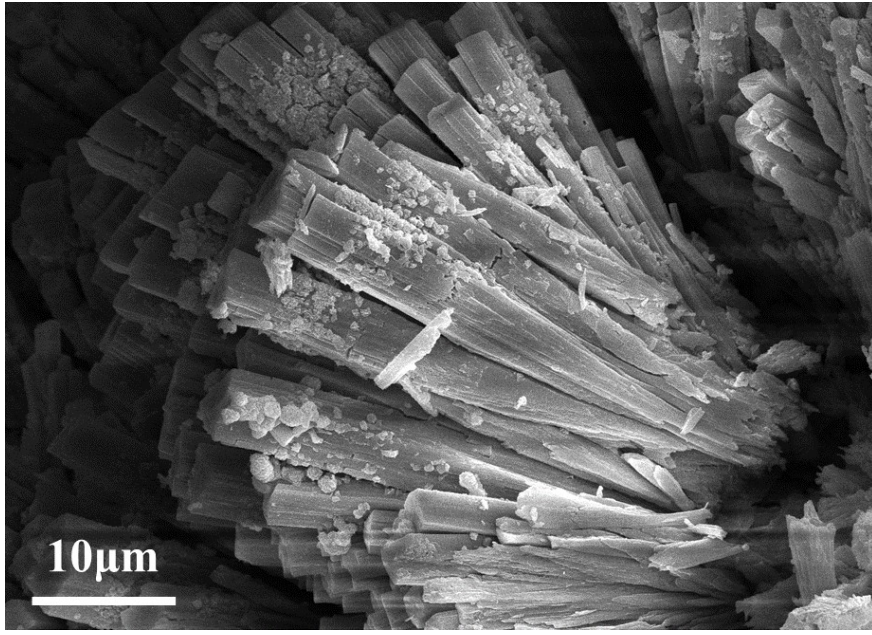

Fig. S9. SEM image of CoMoO<sub>4</sub>/NiFe-LDH@NF after 20 h stability test.

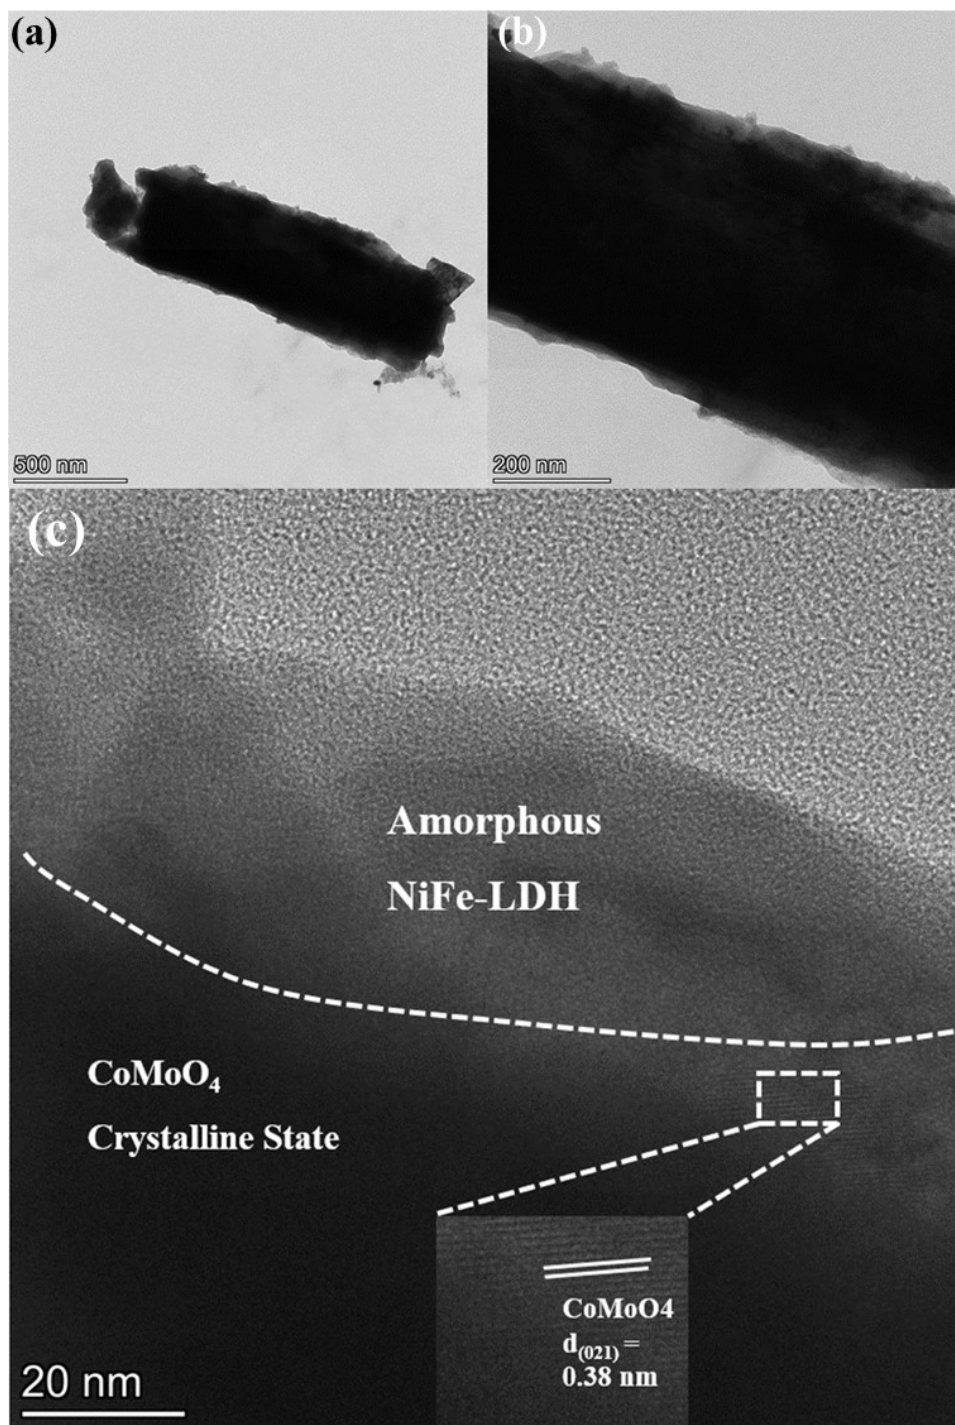

Fig. S10. (a, b) TEM and (c) HR-TEM image of CoMoO<sub>4</sub>/NiFe-LDH@NF after 20 h stability test.

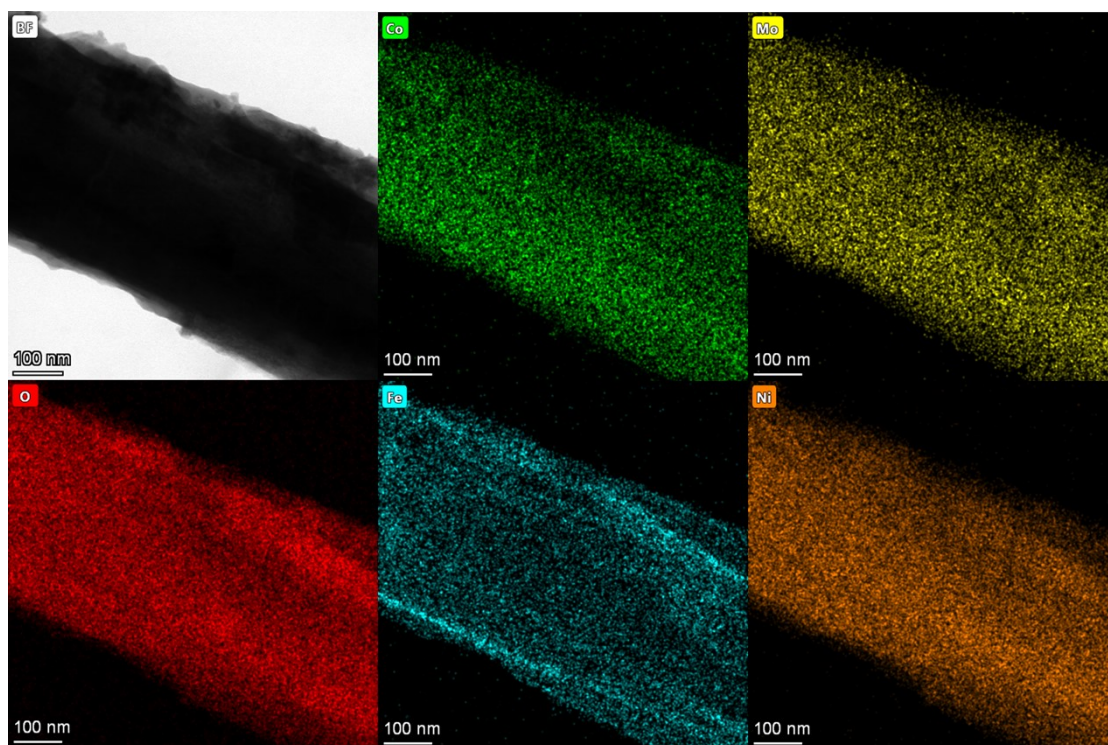

Fig. S11. HAADF-STEM and EDX elemental mapping images of Co, Mo, O, Ni and Fe in  $\text{CoMo}_4/\text{NiFe-LDH}$  after 20h stability test.

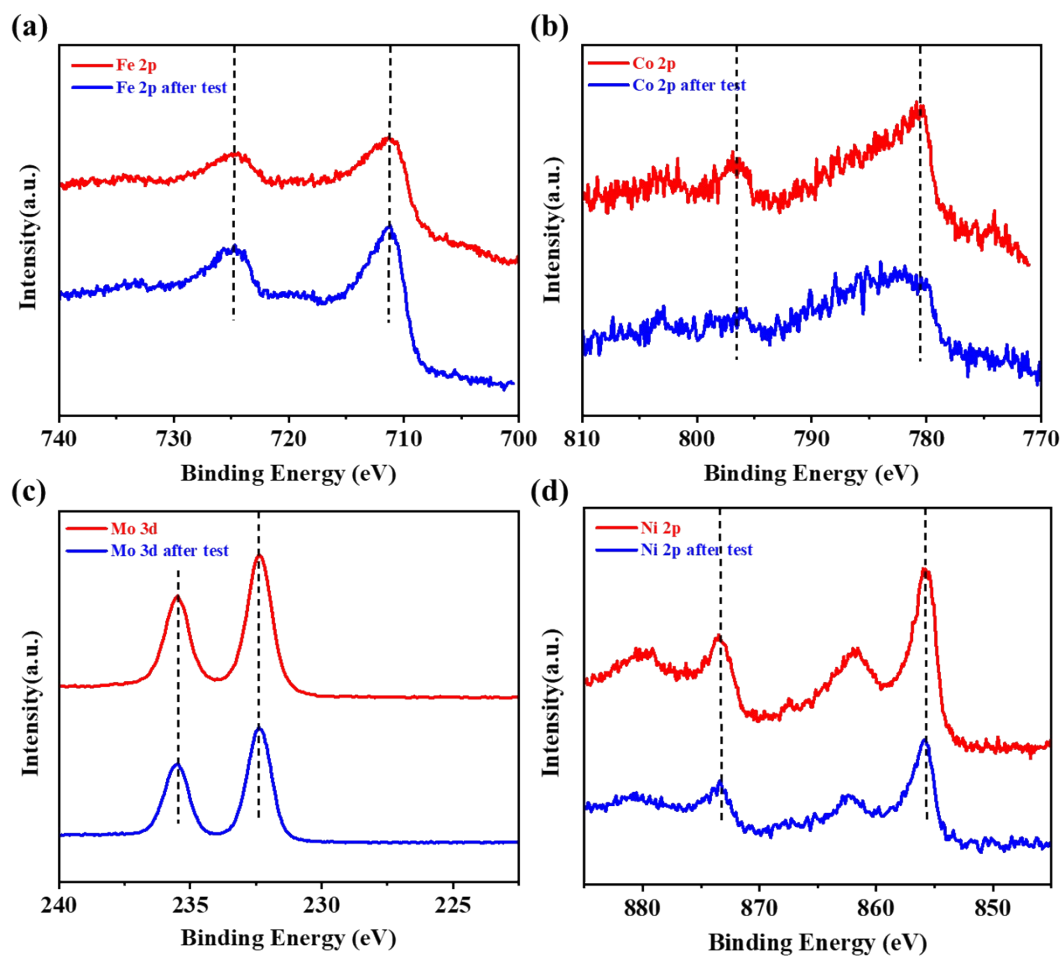

Fig. S12. (a-d) High-resolution XPS spectra of Fe, Co, Mo, and Ni after 20 h stability test.

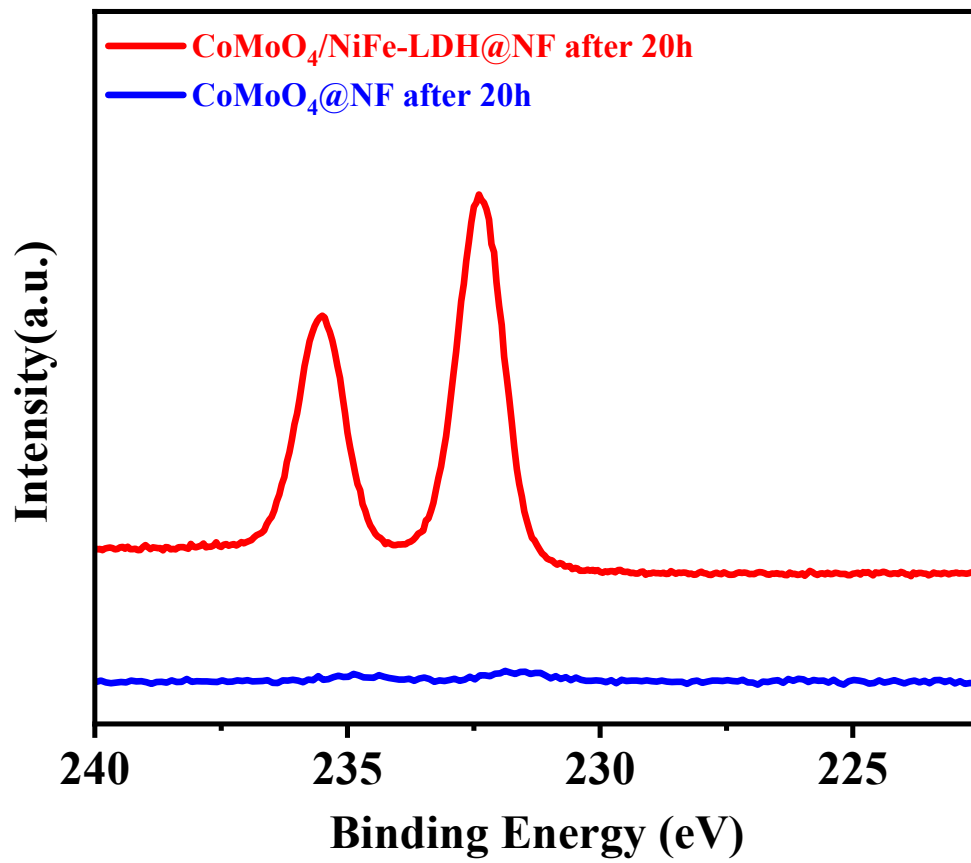

Fig. S13. High-resolution XPS spectra of Mo in the CoMoO<sub>4</sub>/NiFe-LDH@NF and CoMoO<sub>4</sub>@NF after 20h stability test.



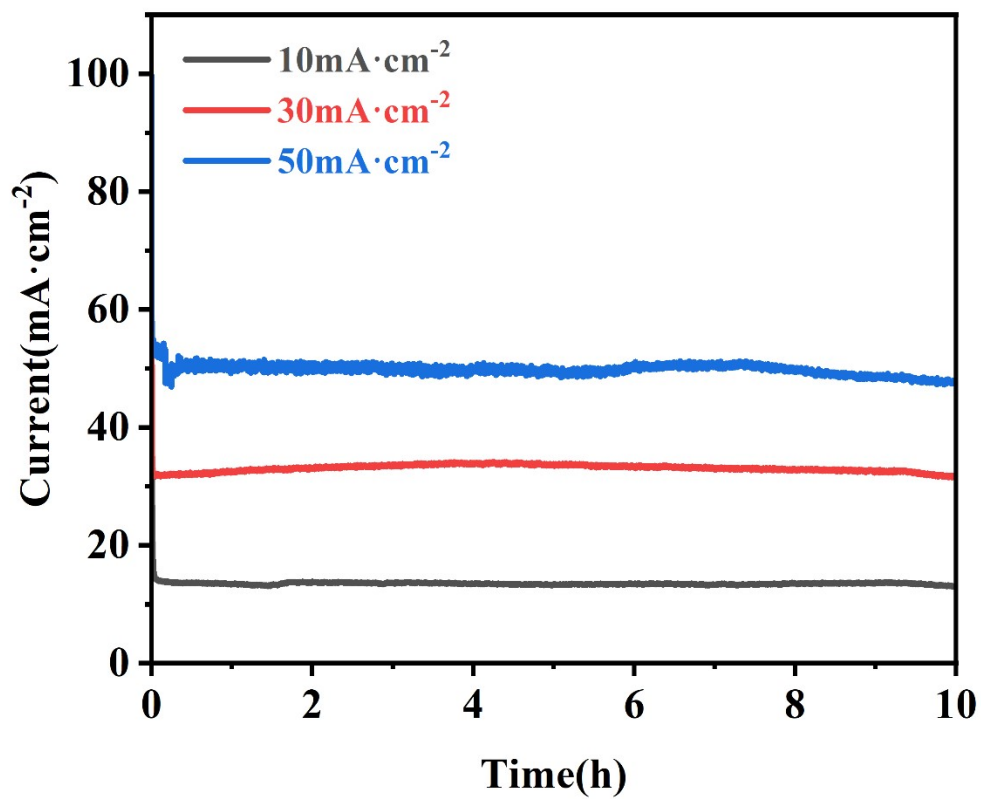

Fig. S14. I-t curves of CoMoO<sub>4</sub>/NiFe-LDH@NF at different current densities.

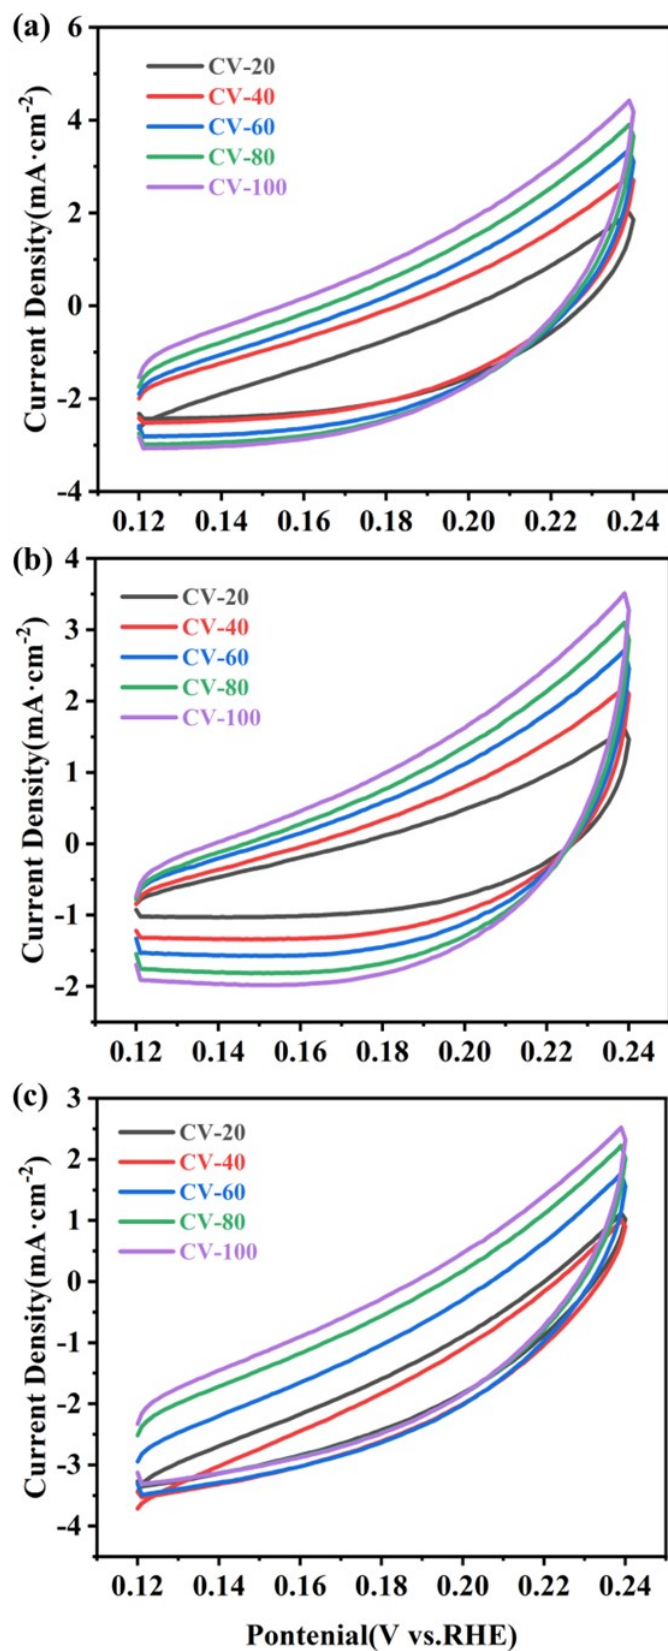

Fig. S15. CV curves of (a). CoMoO<sub>4</sub>/NiFe-LDH@NF, (b). CoMoO<sub>4</sub>@NF, and (c). NiFe-LDH@NF.

Table. S1. Fe content change of 1. CoMoO<sub>4</sub>-150/NiFe-LDH@NF, 2. CoMoO<sub>4</sub>-300/NiFe-LDH@NF, 3. CoMoO<sub>4</sub>-450/NiFe-LDH@NF, and 4. CoMoO<sub>4</sub>-600/NiFe-LDH@NF

| Element | 1. Atomic percentage | 2. Atomic percentage | 3. Atomic percentage | 4. Atomic percentage |
|---------|----------------------|----------------------|----------------------|----------------------|
| O       | 65.89                | 63.78                | 61.94                | 59.86                |
| Fe      | 0.86                 | 1.23                 | 1.75                 | 2.37                 |
| Co      | 6.94                 | 7.56                 | 8.19                 | 9.03                 |
| Ni      | 11.32                | 13.43                | 15.02                | 15.81                |
| Mo      | 14.99                | 14.00                | 13.10                | 12.93                |

Table. S2. OER activity comparison of different electrocatalysts.

| Catalysts                                  | Current density (mA cm <sup>-2</sup> ) | Overpotential (mV) | Ref.             |
|--------------------------------------------|----------------------------------------|--------------------|------------------|
| <b>CoMoO<sub>4</sub>/NiFe-LDH@NF</b>       | <b>10</b>                              | <b>180</b>         | <b>This work</b> |
| NiFe-LDH/NiCo <sub>2</sub> O <sub>4</sub>  | 50                                     | 290                | 1                |
| NiFe-LDH@CoS <sub>x</sub>                  | 10                                     | 206                | 2                |
| NF@NiFe-LDH-1.5-4                          | 100                                    | 190                | 3                |
| NiFe-60/Co <sub>3</sub> O <sub>4</sub> @NF | 100                                    | 221                | 4                |
| Co <sub>9</sub> S <sub>8</sub> @NiFe-LDH   | 50                                     | 287                | 5                |
| NiFe-LDHs/Ni(OH) <sub>2</sub>              | 50                                     | 292                | 6                |
| NiFe-LDH-Ti <sub>4</sub> O <sub>7</sub>    | 10                                     | 200                | 7                |
| FeNi <sub>2</sub> S <sub>4</sub> @NiFe-LDH | 100                                    | 238                | 8                |
| V-NiFe LDH@Ni <sub>3</sub> S <sub>2</sub>  | 10                                     | 178                | 9                |
| NiMoP@NiFe-LDH                             | 150                                    | 299                | 10               |

---

|                                                                       |     |     |    |
|-----------------------------------------------------------------------|-----|-----|----|
| S-NiMoO <sub>4</sub> @NiFe-LDH/NF                                     | 100 | 273 | 11 |
| MIL-101@NiFe-LDH                                                      | 10  | 215 | 12 |
| NiFe-LDH@Co(OH) <sub>2</sub>                                          | 10  | 130 | 13 |
| v-NiFe LDH microtubes                                                 | 10  | 195 | 14 |
| Fe <sub>0.5</sub> Co <sub>0.5</sub> MoO <sub>4-x</sub> S <sub>x</sub> | 10  | 263 | 15 |
| CoMoO <sub>4</sub> @CoNiO <sub>2</sub>                                | 10  | 180 | 16 |
| CoMoO <sub>4</sub> nanotubes                                          | 10  | 315 | 17 |
| A-CoMoO <sub>4</sub>                                                  | 10  | 264 | 18 |
| Co <sub>3</sub> Mo/CoMoO <sub>x</sub>                                 | 10  | 256 | 19 |
| F-CoMoO <sub>4-x/2</sub> @GF                                          | 10  | 256 | 20 |

---

## Notes and references

1. Z. Wang, S. Zeng, W. Liu, X. Wang, Q. Li, Z. Zhao and F. Geng, *ACS Appl. Mater. Interfaces*, 2017, **9**, 1488-1495.
2. Y. Yang, Y. Xie, Z. Yu, S. Guo, M. Yuan, H. Yao, Z. Liang, Y. R. Lu, T.-S. Chan, C. Li, H. Dong and S. Ma, *Chem. Eng. J.*, 2021, **419**, 129512.
3. X. Li, C. Liu, Z. Fang, L. Xu, C. Lu and W. Hou, *Small*, 2022, **18**, 2104354.
4. J. Lv, L. Wang, R. Li, K. Zhang, D. Zhao, Y. Li, X. Li, X. Huang and G. Wang, *ACS Catal.*, 2021, **11**, 14338-14351.
5. X.-T. Gao, Z. Yu, K.-X. Zheng, J.-M. Yin, Y. Zheng, X.-M. Zhu and Y.-W. Dong, *Mater. Lett.*, 2022, **319**, 132302.
6. W. Mu, D. Bao and C. Chang, *Int. J. Hydrog. Energy*, 2022, **35**, 15603.
7. K. B. Ibrahim, W. N. Su, M. C. Tsai, A. W. Kahsay, S. A. Chala, M. K. Birhanu, J. F. Lee and B. J. Hwang, *Mater. Today Chem.*, 2022, **24**, 100824.
8. F.-L. Wang, X. Yu Zhang, J.-C. Zhou, Z.-N. Shi, B. Dong, J.-Y. Xie, Y.-W. Dong, J.-F. Yu and Y.-M. Chai, *Inorg. Chem. Front.*, 2022, **9**, 2068.
9. J. Bai, T. Zhou, Y. Gao, M. Zhang, X. Jing and Y. Gong, *Dalton Trans.*, 2022, **51**, 4853-4861.
10. L. Xiao, W. Bao, J. Zhang, C. Yang, T. Ai, Y. Li, X. Wei, P. Jiang and L. Kou, *Int. J. Hydrog. Energy*, 2022, **47**, 9230-9238.
11. H. Wang, L. Chen, L. Tan, X. Liu, Y. Wen, W. Hou and T. Zhan, *J. Colloid Interface Sci.*, 2022, **613**, 349-358.
12. J. Huang, K. Li, L. Wang, H. She and Q. Wang, *Chin. Chem. Lett.*, 2021, **8**, 3787-7791.
13. Y. Yang, Q. Zhou, L. Jiao, Q. Yin, Z. Li, Z. Zhang and Z. Hu, *Ionics*, 2021, **28**, 341-351.
14. S. Liu, H. Zhang, E. Hu, T. Zhu, C. Zhou, Y. Huang, M. Ling, X. Gao and Z. Lin, *J. Mater. Chem. A*, 2021, **9**, 23697-23702.
15. B. Fei, Z. Chen, Y. Ha, R. Wang, H. Yang, H. Xu and R. Wu, *Chem. Eng. J.*, 2020, **394**, 124926.
16. X. Du, G. Ma and X. Zhang, *Dalton Trans.*, 2019, **48**, 10116-10121.
17. R. Wang, F. Li, J. Ji and F. Wang, *Appl. Surf. Sci.*, 2022, **579**, 152128.
18. L. Ge, W. Lai, Y. Deng, J. Bao, B. Ouyang and H. Li, *Inorg. Chem.*, 2022, **61**, 2619-2627.
19. Y. Liu, Y. Xing, S. Xu, Y. Lu, S. Sun and D. Jiang, *Chem. Eng. J.*, 2022, **431**, 133240.
20. W. Xie, J. Huang, L. Huang, S. Geng, S. Song, P. Tsiakaras and Y. Wang, *Appl. Catal. B*, 2022, **303**, 120871.
